# Supplementary material for: What Was Old Is New Again: The Pennate Diatom Haslea ostrearia (Gaillon) Simonsen in the Multi-Omic Age
Source: MDPI journal article supplement (doi:10.3390/md20040234), 2022-03-29
Supplement: s1 [file s1]

## Supplementary Materials

Review

# What was old is new again: the pennate diatom *Haslea ostrearia* (Gaillon) Simonsen at the multi-omic age

Noujoud Gabed <sup>1,2,3</sup>, Frédéric Verret <sup>1,\*</sup>, Aurélie Peticca <sup>4</sup>, Igor Kryvoruchko <sup>5</sup>, Romain Gastineau <sup>6</sup>, Orlande Bosson <sup>4</sup>, Julie Séveno <sup>4</sup>, Olga Davidovich <sup>7</sup>, Nikolai Davidovich <sup>6,7</sup>, Andrzej Witkowski <sup>6</sup>, Jon Bent <sup>1</sup>, Amel Khitem <sup>1</sup>, Efsthia Ioannou <sup>8</sup>, Aikaterini Koutsaviti <sup>8</sup>, Vassilios Roussis <sup>8</sup>, Hélène Gâteau <sup>4</sup>, Suliya Phimmaha <sup>4</sup>, Vincent Leignel <sup>4</sup>, Myriam Badawi <sup>4</sup>, Ferial Khier <sup>4</sup>, Nellie Francezon <sup>9</sup>, Mostefa Fodil <sup>4</sup>, Pamela Pasetto <sup>9</sup> and Jean-Luc Mouget <sup>4</sup>

**Citation:** Gabed, N.; Verret, F.; Peticca, A. What was old is new again: the pennate diatom *Haslea ostrearia* (Gaillon) Simonsen at the multi-omic age. *Mar. Drugs* **2022**, *20*, x. <https://doi.org/10.3390/xxxxx>

**Academic Editor(s):** Leila Tichine, Wim Vyverman, Detmer Sipkema

**Received:** 7 February 2022

**Accepted:** 18 March 2022

**Published:** 29 March 2022

**Publisher's Note:** MDPI stays neutral with regard to jurisdictional claims in published maps and institutional affiliations.

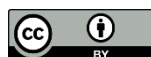

**Copyright:** © 2022 by the authors. Licensee MDPI, Basel, Switzerland. This article is an open access article distributed under the terms and conditions of the Creative Commons Attribution (CC BY) license (<https://creativecommons.org/licenses/by/4.0/>).

- 1 Institute of Marine Biology, Biotechnology and Aquaculture, Hellenic Centre for Marine Research (HCMR), 71003 Crete, Greece; gabednoujoud@yahoo.fr (N.G.); jonbent@hcmr.gr (J.B.); khitembenali24@gmail.com (A.K.)
- 2 Oran High School of Biological Sciences (ESSBO), Cellular and Molecular Biology Department, Oran 31000, Algeria; gabednoujoud@yahoo.fr (N.G.)
- 3 Laboratoire d'aquaculture et bioremediation AquaBior, université d'Oran1, Algeria; gabednoujoud@yahoo.fr (N.G.)
- 4 Laboratoire Biologie des Organismes, Santé, Environnement, Le Mans Université, Avenue Olivier Messiaen, 72085, Le Mans, France; Aurelie.Peticca@univ-lemans.fr (A.P.); orlane.bosson@univ-lemans.fr (O.B.); julie.seveno@univ-lemans.fr (J.S.); helene.gateau@univ-lemans.fr, (H.G.); Suliya.Phimmaha.Etu@univ-lemans.fr, (SP); vincent.leignel@univ-lemans.fr, (V.L.); Myriam.Badawi@univ-lemans.fr, (M.B.); ferial.khier@univ-lemans.fr, (F.K.); mostefa.fodil@univ-lemans.fr (M.F.); Jean-Luc.Mouget@univ-lemans.fr (J.-L.M.)
- 5 Biology Department, United Arab Emirates University (UAEU), Al Ain 33013, United Arab Emirates; igor.kryvoruchko@uaeu.ac.ae (I.K.)
- 6 Institute of Marine and Environmental Sciences, University of Szczecin, Mickiewicza 16, 70-383 Szczecin, Poland; romain.gastineau@usz.edu.pl (R.G.); nikolai.davidovich@usz.edu.pl (N.D.); andrzej.witkowski@usz.edu.pl (A.W.)
- 7 Karadag Scientific Station, Natural Reserve of the Russian Academy of Sciences, Kurortnoe, 98188 Feodosiya, Russia; olivdav@mail.ru, (O.D.); nikolaid@yandex.ru (N.D.)
- 8 Section of Pharmacognosy and Chemistry of Natural Products, Department of Pharmacy, National and Kapodistrian University of Athens, Panepistimiopolis Zografou, Athens 15771, Greece; eioannou@pharm.uoa.gr (E.I.); kkoutsaviti@pharm.uoa.gr (A.K.); roussis@pharm.uoa.gr (V.R.)
- 9 Institut des Molécules et Matériaux du Mans, UMR CNRS 6283, Le Mans Université, Avenue Olivier Messiaen, 72085 Le Mans CEDEX 9, France; nellie.francezon.1@ulaval.ca (N.F.); pamelapasetto@univ-lemans.fr (P.P.)

\* Correspondence: fverret@hcmr.gr; Tel.: +30-2810-337-852

## 1. Supplementary Material and Methods S1: Experimental details on Frustules exploitation

The two required oligomers with a triethoxysilane group at a chain end and a hydroxyl group at the other (Mn 1900 g/mol,  $\bar{D}$  2.2) and the di-acrylate oligoisoprenes (Mn 4100 g/mol,  $\bar{D}$  2.1) were synthesized from solid natural rubber following a procedure described in Tran *et al.* 2021. Model mesoporous silica particles were synthesized dissolving 12 g of hexadecyl trimethyl ammonium bromide (1 eq.) and 16,1 g of tetraethylorthosilicate (1,3 eq.) in 250 mL of ethanol and adding a solution of 65 mL of  $\text{NH}_4\text{OH}$  in 200 mL  $\text{H}_2\text{O}$ . The solution was stirred for 1h at RT, then the whitish suspension was filtered and the silica particles were washed with 150 mL of ethanol, dried at 80°C overnight and calcined in an oven at 500 °C during 24h. TEM images showed that the particles had a perfect spherical morphology, with 150 nm average diameter and pores oriented perpendicularly to the surface, with 21 Å pore diameter (Figure 12 main text). The elimination of the organic matter from *Haslea ostrearia* was carried out by treating the dry biomass (2 g) at RT overnight with a mixture of concentrated nitric and sulfuric acid (30 mL of each), then washing with distilled water until pH 7. The frustules were dried at 80°C and TEM micrographs showed debris with a dispersion of sizes and morphology, with complete elimination of the organic content even from inside the squares of the regular network. BET measures showed that the silica of the frustules is mesoporous too, with 0.35 cm<sup>3</sup>/g pore volume and 41 Å pore diameter. The grafting conditions were optimized using the mesoporous silica particles (0.5 g) and incubating them in dry toluene (10 mL), at reflux overnight, under argon, in suspension in a 0.09 M solution of silane-oligomers (1.5 g in 10 mL toluene). After filtration, the functionalized particles were extensively washed with dichloromethane and dried in an oven at 80°C. The same procedure was used with the frustules debris. BET measurements showed that the specific surface for the mesoporous particles diminished from 1269 m<sup>2</sup>/g to 425 m<sup>2</sup>/g after grafting, while for the frustules decreased from 336 m<sup>2</sup>/g to 6.4 m<sup>2</sup>/g. TEM images confirmed that both synthetic and biosilica were surrounded by a layer of polymer coating (Figure 12 main text). Thick films were obtained by mixing 200 mg of di-acrylate oligomers and 1 or 5% weight of silica particles, in presence of 5% weight of Darocure photoinitiator, and irradiating the formulation deposited in teflon molds (1 cm diameter, 0.5 cm depth) for 10 minutes under a UV-lamp (intensity ~29,4 mW/cm<sup>2</sup>). Visual observation showed that both bare synthetic and biosilica particles formed aggregates in the film volume, while functionalized particles were more easily dispersed, confirming the initial hypothesis that the rubber thin layer would improve dispersion in the rubber matrix. Of course, the silica frustules will not replace carbon black or silica as charges in elastomers applications such as joints or tyres but this study showed that the biosilica can give the same chemistry as the synthetic one, opening the way for other interesting applications.

## 2. Supplementary Information S1: Sequence of *H. ostrearia* DNMT homologues

```
>TRINITY_GG_4998_c0_g1_i2 len=2651 path=[0:0-858 1:859-933 2:934-1694 4:1695-2650] Gene_family="DNMT3"
TTGACATCAATATTCTTGTTGGAAATAGTATAGTAAATAGCTAAGTCTCTTGTTCACAAACACGAAGCA
TCAATCTATCCACGTGCCCGGAATTATCTCCACCGATGATTCTTCGACCTGAACCAAGCAACATAAT
ACATGAAGCCATCAGAAAGAAAGTAGGCCGTCGTAATCACCATGACGAAATTCAAATAAGTCTATAT
GTATGTCTAATAGAGGAAACAAACATAATCCGATTTCAAACAAAGTCAATCAATGACTTTTAGTGCC
TTCAAATCCGAGATATCCTATGCTTCCTTTCTTGTTCATGTGCCGATTCCACTCAACACAAATAGAT
AAATCTTCATATAAATTCAGCCATACCCGGCATACTGCCCTACCACGAGAAACATATCGAGCACTAT
GTTCTCAGTATCGTATTCAGATTCACCTCGTTGCGGAATCATCGATAGAATCTTCCCAGGCAAAGTTGT
AATCATATCCTTTGTATTCTCTTGAGGCAAAGTATCTTTGAAGTGGTCTCAATATGATGGCGACTGTG
GAATTGAAAAGGAATTACCAATCAACCGCTTAGAATATTGGTCGACATTGTAGTATGATGGAGAAGTC
GTCGTCATTGGTGGTGTCTATCTTCACTTGGGGTAGTCCATTTAAACGCGTCAAATTTGTACGACTGA
CAACGATCTGGTAGTCTATGGTAGTTGCCAGCAAAGGTATGGTACTTTTTTGGGAGTTTTTCTTCCAG
GCTAGTTCAGTGTCAAATAGAACCCCAAGCGGTTTGTCAAAAGACTGCCAAATAGCTGATCCATTGG
CTCTTTCACGTAATTTAGGGGCATACCCATCATTGCTTTGAGTTGAAAGAGGCCAGAAAGTGAGACT
```

TCAATTGCAAACCTCTACGTTCCCATACGAATTGATAAAACCCACCTCCCTTTCTTGTACAGTTATATGCC  
 TTCCTACAAATTGTTTGTGCGCTTTCTTAAACACCAACATCCTTTTCATCATTTACCTGCCCCAACGACGC  
 CATAAAGCACTGCATTTTCGCAACCATGTCAGGCTCGAAGAAATGTTTAGCAAGTTGAAAGTCGTCAT  
 CAAGGCAAGTGCTTGCAGCAGGATCCTTCATGTCCTCTGCCTTGATACCCACTGGAATGTTGGTGAGA  
 AACGTTGCTTTCCGACGGCATGGTGAATAGTCGCTTGATCTAGAGTAATTGACCACTCTATATCGTAT  
 GCTTGCTCGATTGTGTGGAGTTCGCCCCGATTCAATAGGTTGCTTTGCACTGTTGGAAGACGCGTGTT  
 TCTCCCATGAAAAATAATGGTTTGGATTGTTTTCTTAACTGTTGTAACAACCTGCCGAAGCGAACC  
 ATGTAGCTCCCTTGGTTTCCACGTGTACCTTGGCGGCTGGCATTCACTCCTGAATAGTCGACGCACGGT  
 GGACCCCCACGACAAGGTCAATCGGTCCATGCTTTAGTAAAAAAGTCTCCAGAAATTTCTTCTAAATG  
 TTCAAAGGTGCTATAGTAAACATGTTCAATGCCATCATCGTCCAGTTCAGTGTGTATGAGCAATCATG  
 GTTATGCTTATAAACATGAGTTGCAACCTTATCATGCTCCACATGAATTACTTTCTTCATGGCTATTCCA  
 AGGCGTTTAAGACAAATGATCGCAGATCCAATTCCAGCAAAACAATCCAAGACAACAGCAGCTCCCT  
 TTTTTCTAGGTTGCAATGTTTTTCGAAAAGTTTCATATTCGTGCGAGTAGGATTGATTGCTTTGAAGTAC  
 TGAACACGGACTAGGTAGGCTGTCTGCATTGTACATTTCCGATTCTTGACTTTTCAAGGTTTCGATCTTT  
 TGGAGAATCTGCCCCTGGAAAACGTTTCTCTGCTGATATTTCGACTATTTTCAAAAAACAATGGTTCA  
 GAGGAGTCATATGCACTATTTCATAGCTTCTCGACAGGAGCTAGCCATTCTTCAGAAGGATTAGTCAC  
 ATTATGGCAACATCTTCGATGCCAGAGAGAGTTATCACCAGAGTGAACAAAACCTGCTTTTCTAAAT  
 TCTTGAAGTGTGCTGGCGAACATTACAGCGGTAACAACAAAAGGCCAGTTGTCTTCAATTTCTCTCA  
 ACCTCGTAGTGACACCCGGTAACGTCCCCACTTCCATTGCACAATTCCAAGCATGCTTTGCTGAAGCT  
 TTCTGTGCTTTTGTGCGCGCTCATAAGAAACATCGCCATAATCATCTTGAATCAGAAGGGTCCGCG  
 TTTCCGACAGCAACATTTCTTCTGTGCGCTTGTCTCATGATCCCCCTCTTTCTTCAAGTTACTATTATT  
 CTTCTGTGCAACTCTTCTACTCGATCTATCACTCTTTCTCCAAAACCTGTGCCGATTGAACTTTATTAGG  
 CCAGCCTTCTAACGAGTGCTAAGATGCTTACACGTTGCGAGATGGATAATCCCACCTTCGATCCGAC  
 TTTCTTCTCAAGGTGATGAGATGTGATTTGAAGAATGTGCGAAAGTATAGTAAAGTGGCATCCGACAAAT  
 GTTGTGTTTCTACCTTGGATGAAATTGAGTAGAGTATAATAAATTACTACATACACGTGGTCTTGTGGT  
 GGCAGTAGAAGTCGCAAAAAGAAAGAAAGAAACGCTC  
 >TRINITY\_GG\_3357\_c18\_g1\_i2 len=6743 path=[0:0-5174 1:5175-5245 2:5246-6742] Gene\_family="DNMT5"  
 TTTTTTTTCATCATAAAACAACGACTATTAATATTTAGCGTATCACGTAACATAGATTGACGATCCTGAA  
 TCACTGTAACCTCCCATAGGCACTGCTTGGCCATAATGCAACCCCCACCCCTCTCTCAGATGCTTTGTTT  
 AATTATTCGTCACCAGCGTTGGTTGCTTTGGAAATGATTTCCTCGTCCGTAATCCTTCGTAACAGTTGCC  
 CGTCAAGACATTTCTCTCCGTTCCGGCCCTTCAACCTCAATTCGATATACGTTACAGAGAGGTCTTAGTT  
 GACCAGCAGAAATACTCTACCAATCGCCTGCTCGGTACTGGCATCAGCCACAGGATCTGAACCTT  
 GAACCACCTGAACCCACGTAATAACGGACTGAATAGGACCAAGTTGTAGCACTCGGTTGTAAAGTTCAA  
 ACCTGCTGCGTGCTCAAAGTGCAAGATTAGTATGCGAGGACGCTTTCGATCTTCTTGTGGCATCACC  
 TTGTTGATACCAGGAGATTTTCTTATTCTTCATGGCAACCGAATCAGTTTGCTCGAGCCATGTGCAACC  
 AAGACCGCTCTCTTCCAAGGAATCAATAGCAGCTTGCCCAGCCCCAATACGACCATCTGTAAAGACC  
 ACTATTTTTGTTTTGGGTCACTTTTTAGGACTTTCTGACAAATTTCCACCAATTTCTTGCTCGGCTCTC  
 CAAACTTGAATTCTGTCTCAGGAACCGGGTATATCATGACCAGACACATAAAATCTCGGGTT  
 TGATTGCAAGACACCGTTTGTGCTGACTAATTCCACTTTGACTCTTAAGTACAAAGCTTCTCTTCTC  
 GGACATTTTACCGTACAGCGGATTTACGCTTCTTGATTCCATTCAATTCGCTCCTGCCTTGTGCGG  
 CAACAAGCAACTTTCAAGTACTCCTGGCATTTTGAAAAGATGGCTTTGCGAATCTCGCGACCTTGCTTT  
 GGTTCCAGATAGTTCTGCAAGAAAATGTGCGGGCATGATTCTCGCTCTAATTTCCGCAATGAGAAGA  
 CAGTCCGATTACATAGACGCTCCCATAGATTGCCAACTCAATAACTCTGTCACTGCTGTCAAGCA  
 ATGGCGTTCGGTTAAACCAAAACACAGCTCTCGGCATACAAGAGGTCGAAGCTTGGTTTGTGTGT  
 GTTATGCCAAGGAACACACGCCCTGCTCTCCGATTCTTTTCTTGAAGAAACCTGAGTCTGCTCTTT  
 GTTGCTTCTTTGCTCTTTTATTTCAGATTTTGTGTGACAAGCATTTCATGAATCTCATCAACGAATAT  
 TCGCTCAAATTCAAAATATTCCAGCGGAACACCTTTCTCATAGGATTGAAACTGACGCTCCTTAACGC  
 CACAATAGCTTTTGGTACGTGTACGTATAGAAGGCAGATTGATCCCTCCTTCGCTGTCTCTTGGATT  
 GTTTCCTCCGCCATATGGATCTGTTGATGTAGCAGGGATCCACAGTCTCGCGCAGCTCGTTGCTCCAG  
 TTGACCATCGTAATGTGGAAGAACGGGCAATGTTCCGGTGTGATCTCAAGTCTTCTGACTTCTGCAAA  
 GATTCTTGAAATATCCAGCTGATTGAGAAATATCAACGGGACAAATAATTATGTGAGCTTTCATAATG  
 GTTTCAGCAGATGTGACCTTTAGAGCTGCGAAATCATAAATTTTCAACACAGTCAAGCCGCTAGTAAA  
 CTTTCCAACCTTCACTTTCCCATGATCGATAAGTGCAGGCGGGACAACCACAATCGTCGCCCCGCTTTT  
 CCTTGGCTTGGCGCGTGCTGCTCTAGCACGAGCAATCCCTTGTAGAATTATGGCAATTGAGATTACCGT  
 CTTTCCGGCACCAATCGCGTCAGCAATTACACCACCTTTGACTTGGGTTGGCATAGTAGCCTTGGCAAT  
 TAACGATATTCCCGCAGCACCAAGGCATATCAAACCTCGCTCATTTCAATCTCGTCGATTTTTCTGTCTG  
 TCCTCAATCGACAACATTTTTGTGCAACTTTTTGTGTGCTTCATACAGACGGAAAGGTCCTTCGAGA  
 TTAACCTCCGTGTTTCTTACCACCTGCAATTGCTGACAACGAATGGAGTGACAATGGGATCGCTTTGC  
 TGAGTAATATCAGAGAGCTTAAAGCTTACCGTTAGATTCTGTCCAAAGGAATCCCTCCACGACCTCT  
 AATGAGGTGTCCCGTGCATGATGTGCTGCGACTGAAGGGTCGAGCTGATGGTAATGCTCCGAGCTT  
 CAGTGTCAAGCTCAAATTCGAAGGTGCGAGGTGCTTCTGAGCTGCGAGTAGTACTTGGTGCTGCT  
 CCAGGGTCACTGTTTCTCTCGTAGAGTCTGTGTTTGGCTTCAATGGTACAGTCTCCTCGTGAAC  
 CCCACTTCTCCGTTGGACGGATTGGGACAGTCTTGAACAACGCCCAATGAAACAGAGTCAGTTGGT  
 TCCACTACTTCCCAACCTGCTGCTGGAGACAAATCATACTTGAAGCCACCAGATGCTGCTAGCTGTAG  
 CAATGGAGCAACACAAACAGAATTGAGGACACGAAGCATGCTGTACATGATTCCCTCCTTTCAGA  
 TTCAATTTTCATGCGGTTGCTTGTGTCATCCCTGACTTAGAAGTGTTACATTATCTTTCGAAAGCCCAG  
 AAATCTTTGCAAGTACGTTTGATTGATCACTGCCCTTGGACTGATAATGATGACTCCGGGATTAGGC  
 ATTGCATCTTCGGCAGGATTGTCCATTCCCTAAAGGCTAGACTGAGTCCGAGATTGCAAGAAATCA  
 CAGGGTTCCAGAAATTCGGGAACCTCGGCTATGATGGAAGATAGGTGCTGCTGCTGCTACAGACAGGG

AAATTATTGCTCTATCTGGACCAGTGGCGCTAACGTTAGGCCGCATAAGTAAGTACAATGATGGACGT  
 CCGCCTGAAGCCTTTTAAATGTAAAGCGCAGATTGGTTGGTGGTCTGCCGACAAGCTGCACGGTCATA  
 ACTTCCGAAGAGATCAAGCAAATCCGAGCGTGTGGTTTAAATCTCGATTCTCTGTGGCCACTTCTTCCA  
 TCCATTAGAATACACCCATCTTCGTTGCTCACCTCTTTCCTTCGCATTTCGGAAAGTCTTTTTTGTTCGTTT  
 TCAGCGCTTCTTGATGTCATCCAACACTGTTTCTTTGAGCCCCAACCTCAATGCGTGGTGATGGAGTTGT  
 TTCCTCGCCACTGACAACAACATCAATCTCTCTAGATAATCCCATATTGCCCTGCCATTCTTAGAAGA  
 GTCATGAAGATCATTCTTCATCGAAATAATAAGCTTTGCACAGGGTTCGAGCTTACCAAACACCAACG  
 GTTCTGTTCTAGCAGGAACAAAAGAGGTGATTCTGCCATCAAACCCACTGATATCGACTCTTGATTCA  
 CAACTTCTTCGCGTTTCAATTACCCGATGGTAAGGCGGAGTTCAGCCTGTGTACACCAACGTTTTTGT  
 TGTCTCGTGATAATATACGACAACCCATTTTCTCCGTTCTCTTTTACACGATGCAAATTGAAGGATC  
 TATGCTTAAGTGATGCGACCCTATGCAAATCTTCACGAAGAGCGCGGATATCATCCCATCCTTCTGAA  
 GATACCATTAACGTGTGCGGTAAGACTTCTCGAAGCTTTGTTTGAACGTTCCAAGGTTGTGCTCAGGT  
 TCAGAAATATCAACCGAACACGTGTCATGTGATGACATGTTGTAGCCAGATACTTGGTTGACACAATT  
 TCTGCAACACGAGACGCGACATAATCGACACTGTAGAAATGCAGAAGTGCAGGAAATTGCTACCACTG  
 GTCTCGCAAGTGCACCATATGGAGGTTTTCACTGCATCCGGAGCCAAGGAAGCTAGTCGTTTGAACAA  
 CTCTAGAGCGTTTCGACATTGACGCTCCGTTGGTACGTCATCGGGACAACTAACGACAAATCTGTCT  
 TCGAGCTCGTTCTGTGTTCTTCTTTCAGCAGCTTTTTCGCTCTTGCAGAGTACCACACTCCTGACGTAG  
 CTGTTGACACGTAATTGCCGCCAAGATAGTCGATGAGACTACAGTGAGGCTCATCGCATTGCCCGCAA  
 GATCTCCAAGCTGTACTTCAGTCTCTGTACCAAGAATCAGTCTTTCATATGGGATTCCCTGCATCAAGA  
 GCTTTTACAGCCCCAACACGGGCGCCCCCTTGTGTGGAACACAAAGTACCACCTGGAGTTTACACAG  
 CCGGCAACACCGGGAGTTGCGGCCCTATGATGTTCTTTAGAGGCATTTTGCAGAAATATTTCCAGAAAT  
 CGAGCAGAAATTTGGGTCGTGAACCTTCTGCATCCCTAAAGGCCGAAGCATAACAATATGTCTAACATGT  
 CGATTTCTTTTGAAGTTGCAGTCTAGATATTCGATCCAGAAATGAGGAGGAACCTTCTTTTGTCCGT  
 AAGGCCCCCATTGAGTGAACCAACGGGCTCTATCTTCCAAACCAAGGTTTTTTCGCGTGTGCTTGTAT  
 GAGGCAGATTGGCGCTTGGCGAAGTCCAAAAGTCAGACTCAAGGAAGCACTTCTTTTGGAGATTCCG  
 CTCGAGGTCCATTGAGCGCTCTCGAAATTTCTGAATTTTTCGTGATCAACTTCCAACATAAAGCGT  
 TCCATTGAATGTCTCGCGGTGTTCTGATGATGTTCAATGATTCTCTCCAGTAGGCACCAAGATCGTCG  
 TAGACATTTCCATCCTGTGGTTGCCATACAAACATGTAGACTCGTTGCCGAGTTTGAAGAACGCCAAA  
 GTCCTTGGTATCAACTGATATAGTTTGAAGTCAATAGGTACATTCTGTCTCAAAGACTAGGGTATCGCT  
 GGATTTTGATATACCGTTTTCTTTTATGAGTTTCAGTAAGCGTACACTTAGTTGCCGATTTTCGATGGCCAC  
 CGAACGGGATTTAGCGTCAAAGAATGTGGCTGAGTATATCCTTGAAGAACTGCACCACAACGATCGC  
 CATAAACGGCAGGAACCGACTCAACAATAATTGCCTTGTGCGCCCTGTGATGAGAATTCGAGGTCT  
 TTTTGGCATCCTTCCCTATGTTCTTGATCGCTTAGTACTTGAACCTTTCAGAGAGCTTGACTCGTCTGT  
 GATATATCCCTCATCTTGTCTACAGCAACCAAAATCACACGTGTTAAACAAATGGAAGTACCTCAC  
 CAACGTGCTCACATTTAAACTTACCCAAGGAGCTAGTTGACGTTCTCAAAAATCGCGAATGGTGGCC  
 TTTCTTTGAATAGAATTTCAACTGCAGCTAGAAATGTTTCTCTGAGCAACCCCTATCTCAATGTCAAT  
 ACGCCATTTTGAACGCATCATCGAAAAGTTTTTGCAGGATGTTCCGGCAATAAAGAGATTGAAGTCTG  
 GGATTGGCTTCTTTGACCATAGACATCCATAGGACGTAAGTCGAACATCTTCCATTCTCATCTTT  
 GCATGTGAGCTTAGTGATATCAGGATACAAAAGTAACTGAAGTTTTCGTGCCAAATAGGCTGTTTGA  
 AGGGGTCAATTTTACAAGAGAACTCGTGTGTATGGACAAAATCAGCGACGCTTCTTAGTTGCAATTGC  
 TCTTGAATCATAGTCAAAGCAAGGGCGGTGCATCAGTTCCACTACAGGCAGTTCCAAGCTTCAGAGC  
 GTGGTTTTTGGTCCCTAGAGGATCTCCTTTGGCGTGTAGGGTCTCTTTCGAGCAACGGAAGAAGCTTATC  
 CACCTGCTGGGAAACGAGATCATTAATAATATCATTTCCACCATCAATACCACCTTGATCCAGCGCAC  
 TCTTGTCTTCTGAATCTCTCCCAAGCAAACTTGGCATAGGATGGCGCAATCATCGGTTTGAACATCT  
 CGGCCATCTTGGGCTTACCAGTGCTTGCTTTGGCGAGGCTTGTGTCACTTTTGTAGTTGTCTTTTTT  
 GGCTTGGCCCGCTTTGGTTCTTCGGGCTCCGCTTCTCTTCTCGTCCGATTCTGTCAACATTGGGAGGTCTG  
 GATCATCGGCGCGGTGCGCTTCAACCATAGAGAAGTCGGAGTCATCATCAGCATCACCGCCAATATCT  
 GAATCGGAATCAAGTAAGACTACCTCTTCTTCTTTGAACCTCTTGTGCGAGGTCAAAGACAGGCTCCT  
 ACTTTCTCGGACCGTGCGTTTCCGTTTCTGAGTTTGGACTGCCTTCTTCTCAAGGTGAATGCTTCACCA  
 TTTAGTGCAGTACCGCTCTTCCAAAGCGTGGCTTCGAATGTTGTCAAATGTTGCAAGTATCTTCCCGA  
 GATACAGCTCGCAGCCCTCGTCTCAATGTTTGGATCAGGTTCCTGTTTCAATCCCTCTCAAGCTTA  
 GTGGACTTACTTGCTTTACGTTTGCCTCGCCGCGACTTTTCAAACAAATGGATATCTCGTCTGCTCCA  
 AGTCTTCTTCGTGCGCATCATCGTATCTAACTCTGTAGACCCACTCGCTCCATCCAGCTTGTGCTAGG  
 AAATTATTTTCCCTGAGAACGGTTCGGGCTTCCCCGCTTTGGATCAAAAAACCCACGCTCTATCTCGG  
 TACCCACATCGTACTTCTGGGAGTGGGATCCGTCGTTTCATCGTTGCTTGTTCCTCTCTAGTCGTTTCCG  
 AGTTTGCCCAAAAAATCTTTAACTGGGGCACTCTGAGGAGTAGTCAATTGCTGCCAATGCGCTTTC  
 GGAGA

>TRINITY\_GG\_3317\_c13\_g1\_i2 len=4655 path=[0:0-3730 2:3731-4654] Gene\_family="Bacterial-like DNMT"  
 CATCTGCTCGATCTTGGATGTCGCTAGCGAATTTTCGGCGGTCAAAGACAAGTTCACAACCTTTCACAGC  
 CCACAGAAGTAGTAGGGTTACGTTTCTAGACTCTCTCTATCTTTAAAAAGATAGAGCGAATAGGAA  
 AGGATATAACAGAAAACCTGGATCTAAAAGATTAAAAAGAGAAAGCTATTCGGAAGTCTTCCCCTCC  
 TAATAGTGCAGTACCGCTCTTCCAAAGCGTGGCTTCGAATGTTGTCAAATGTTGCAAGTATCTTCCCGA  
 CTCGCTTGTGCTGCTTTTAAAAAAATCTGTTTGGAAAGTAGTGAAGCAGTACAGAGCTTCTTCAGAGC  
 TATTGGTTCTGCTTGACGCAGACCAGCCTGATTCATTCGAGCACTTTTCTATCTCTGTCTACCAATTT  
 CCTCGTCTATGGATCCCATTGCTCCACTCTTGGTTCGAAACGCTCGATAAAGTCTTCAAGCGATTCTGTC  
 GTCATCGAGGTCATCGTCTTCCACTGCTTCTTCCAACAGCCGTTCTATTCTTGTGGTACTCTCCTT  
 TGGTATTGGGGGCGCCAGCATCAGCTGGAGACCAAAACATAACTATCATCAAACCAATCGCCCCATTC  
 AGCTTCCAACCTAGCAAACGTTTCTTGAACGCTTCTTCGCTTTCGAAACAGGTTTCAAGAACCTTCGGG  
 CACAGCCGCTGTTTCGGTCTCTTCGCTCTTTGGAAGTGTTCCTTCGATTGTGCTAGTCAATTGCCGTCATGT

CCGTGCCTTTCTCTCCCGTTCCCTCCGCAAACCTTATCTATATTTCTGCAATGGTTTTCTGCAGAGACAG  
CGAGATTCTTCCTTACATTAACGTCGCGACTCGACAGTCGAAGTAGATTGGTCGTGATTCGTTGGT  
TGATTGCGCAATTTTATGTTCCATTACCGCTGCTTCGTGCAGGTCCTGTTGAAGAGTCTGACAAACCTT  
GTATAACTCCGTATTGCTCATGGATGAAATCGAAAAGGTATCTTCGGTTGACTTATCATCGCCCTGCGT  
GTTCTCGTTACCTTTGGATCGTGCTTCCATTTCATCAACCACAGCCAGCAAACGGCCACGAATGATTGC  
CTTTCGCTTAGAGGATGAAGCCAAGAGCAACGTCATGAACCTGCTCTGTGCAGAATATTCAGCCTTTCT  
TTTCATTTCTTTTGAAGATGATGATTCTCCCTCATCGGAATCAGTTGTAGCACTTGTGTCTGCAACAAAA  
AAAGAATCCAGCAAACCCACGCAATCAAACATGTGCACAGAATTGGCTGCAACACCTTGGCCAAACCG  
CCGACGATGATGGTCCCTCAGAAGCAGCTTTCTTTACATCTACAAGATATGAAGAAGTTGTCTCATCAT  
TATTCGCCTTGTCTAAAGGTTTCAAATCATCAGAAACGCCTAAAACATGTTCTGTGTGATGACGACACA  
TCACAAAAGGCATCATCAGGAACATCCTCAGCTTTGCCAACAGCAATCGCAAGTCTTCAGGACTAGT  
TGCCGGGATGCCGTCGGATTCTCGTACAAGACATGAAAATAACCACTGCTTTGCAAGATTAGTCCATA  
GAATTTCAATGCTTTGACTTCCGATGGAATAAATGGCATCCAGGGAACCTTAACCGCATTTTCGTGCCG  
CAGGATGCTGTACCAATGTTTGAAGCAAGGAATCCTCAGCCGTGCTACCCGTGAATCAACGCTTTT  
GCCAAAACCATGGCAGCCACACCATATTGAAGGATGGATGACTCTCTTTTCTCTCTGTAATCAGAA  
TAGCCAGCTAAACGACCCGATTCCGTCAAAAAATTGATGACCATGATAGTCGTTTGAATTAATAAGAC  
GAGCTTTTCTTTCCCTTACGTTGCGCTTGTGAAGCTCCAAGGGTGAGTGCTCCTCTATCTCTTTTCCAC  
TTTTGTTTGGGAATTCCTAACCAATCAGCATCGGTTTGGTGCTTGAATTGTAGACCTGAAAAGTGTGGT  
GTAATGGGAGGCTCCGTTCTTTCAATTGGGCATTCTTTGAAACAATTTCTTCCGAGCATCTTTCCCT  
TTGGACGGGAGACGTAAGCTTTCGCTCTTAGTGAAGACTTTGTCTTGTGGCGCGTCTTTCCAAG  
ATAACTGTCAATGTCTGCTATTGCTTCAAGTCCCTGATTCAATGCATCAGAGTCATTTGAATCCGTA  
CGGAGAACTTGTTCGTTACGTTCTTCTGTTTCTGTTTCGATGCGCCGTTGCATGGCTAGTTTCTCCTTG  
CAATACGAGCTGATAGATCAATCAGATCAGACTCCAAATGTAGACAAACGGCTTCCGAGCGAGCAGC  
AGCGTCAATTGCTCGCGCTACTGCTGCTATTACTGGAAGCCAAGAGATCTGCAAGAGAACCCGCCATAT  
TGTAGGCCGCTTTGGTTCGTTCCGACAGGATTTGGGAGTGTCATGGCAAGAACTGTGCGACTCTTGTA  
ATATATTCCTCAAACTGCCAAGGCTCTCCCGTGGAGCTCGGGGTCTACTGTACAAGGATGGATTGT  
AAAAACCAATCCGTCCTCAATCCAAACGAATTATCCAGTACGGTGGTGCGAAACGCTGTTTCATCATCCAC  
GTCACTCTGCTTTTTCTTCTCTTCAATTTGCTTGTTCGATGCGCCGTTGCATGGCTAGTTTCTCCTTG  
TTCTCTTGTGCTGTTCAATAAAGTCTGCTGGATCATGACAATGATCTGGAAGGCTGGCGACAAAGA  
ACTCTACGCCGCAATGTGCTGCTACCTTGGATAGCATTCCACCCGAACAAATCCGCTCGACAGCTGCT  
GTCCAGCGGAATCATTGTCCATACATAGAATGACACGACCAATTATGACGCGATCGTGCCAATTTGGC  
AGCCGCTGTCAGTTGTTGTGTTGAATGGCCGTTCCCATGGTAGCTACAACCTGCTGAATGCCTGCTTC  
ATGCAATGTTCATGGCATCCATATATCTTCAACCATGACGAGTGGATTCTCGTTTCTCTGTTTCTCTC  
GGTGCCTTGCAGCGCCGTTTCCATCATTCTCGCACAAGACAATCCAAACAAAACATTCTTTTTTGA  
ATGAGTGTCTGACTATTTAGATATTTGGGTGGCTTATAGACGGTCTGCTACTATTGTCGGTGTGCTG  
TCGCCTGTGAAAAGAGTGGAATTAGGCGTCCACCAATCCAAGAACCCGATCGCCCGTCTCGTCCCA  
AATGGGTACCATCATTCTGGCGCGAAACCGATCCATCAAGGAAGAATAATCCAAAAGGGGTGTTGG  
ACAATCGTTGATTTCTTGTGCTGCTGGATGACCACTTTTATGACTTGTTCGAGTGTGTGTCACAGAA  
TAGCATTGGATTGTTTTTGAATAGCCAAACAGAGTCGAGAATTTCTTGGGGCGTAAACCCCTGTGCT  
GCAAATACTGAACCAATGTTGGTTGGCGTGTCTCTGTTGTCGATAGTGTGAATCAAAGTATACAT  
CAGGTGCATATCCCATCAAAAATGTTTGAACAGTTGATGGAGACAATCCTCTGGATTGAAGATAATGC  
CGTGCTGGACCACCCATCAAGTCAGTCAGGCACGTGTTAATAGGATGCTGCTACGGAGTTTGCCAA  
ATAAAGACGTTCTTTTCTTCTTGTGTTTAAAGTTGATCTTGACGCCGCGCGGAACAGACTTGGTCATG  
GACATTATCTCATCGTAGACGGGAACGGTGATCTGGAACAAATCGTTGGAGTGGCATGCTTCTG  
TGAGAAAGACAAGGGCTGATTATGCACTGTTTGAGAATAACTTCGAACAACTGAAAGACATCTCCA  
CCTGCATCACAGACAAAGCACTTGTACATTGGCGCTCTCCATCAATGGATAGGGATGGATTATGATC  
ATCATGAAAGGGGCAAATAGCCTTGGCTCGTTTGCATCAGGGAGGCGTTGAAATTGAGGCAATCCA  
AAGGATTCCACCACATCTACAATGTCTGTGAGTCTTTAATATCCTGCCAGGAGGAAGACTGTGCTG  
ATGTAGTGTGTTACTAGTAGCGTCTGTTGTTGGTTGGCATTTCTATCATAGCGGTGCTGTTGTGAATGT  
TTTGGTATGGAATACTGTGGGGAGAGAAGCTGGAACAACTAGGAGAAATCCAGGCAGTTGCTGGCTCT  
GCATGTTCAGTAGATAAGATATGCATAATAGCCACACCAACCATGCCTCCTTGCCTCTACTGCTTCTCT  
TCTGTTTGTGCTGTTAGGGGTAGTCACAGCAGTGAATACAACATCCTCGTCAACATTCTTTGTAGGCC  
TCCAGTGCCACTCTACTCTTCTCTCAATGTGCTTGCACGATTTTCATCATTGTTTGCCTCTATAGGA  
TGTGCACAATAGCAAGAGATGTGTGCAATCGATGGATCGATGATTGGAACAGAACTGTAAGCCAAG  
TTTCCGCCTTATTGGAGCTTCCGATAATGATGGGGCGGGAGATCCTTGTTCAGCTATATAAGAGATAC  
GAATGGCACAACAACACCCACAGACACCTTGTTCAGAGGGTGGCGATAGTATTGCTTCTATCGCGAT  
TGTGTTTCCGTGGAGTAAGTGTTCCTCCACATACAAACCAACATGCTTGCT  
>TRINITY\_GG\_1357\_c0\_g1\_i1 len=1771 path=[0:0-108 1:109-120 2:121-1770] Gene\_family="Bacterial-like  
DNMT"

CGCAACCTTGTGGCACACGACTGTGTGGGACGCAAGTGGCATCTCGAGGGACGCTACGGCTCGCAA  
ACCTTTGTCGTAGACGATGTCCACATGGGCTGCCCTTGTGTCCAATGCGGTGGCGGAGTGGTAGCT  
CGAAACATGACAACAGACAGGCAAGTTCGAATCGCAACAACTGCTGCTGGCCACGGATCAAG  
GTGGAATTAGGTACCTGCCAGTTTCTATCTCTGATTTGTGACAAAGCTGGAACAAATCGTCGACGC  
GACCGCCACGCGATCGTAAACCTGTGCCTCTTCCCATGAAACTTCCAATGAGAACGCTACCGAACA  
GAATCAGAAGCGACCTCCGGCCTTACGTTTGTAGACCTCTTTTGTGGAATTGGAGGGTTCGCTGTG  
CACTGGAAGCGCTGGGAGGTGAGTGCCTTTGCCTCGGACATTGACGAATCTTGTGCGGAAATGTAC  
GTGGAACACAAAGTGTCTCTCTGGAGACGCTACGGGGACATTATCAAGTACCCGATTACAGATT  
GCCAAGCAGGAATAAGTTGATCTCTTGGTGGGTGCTTTCCCTGCCAGCTTTTCTCGCTCGGCGA  
GCAACCGGGCTTTACCGATGGCTCGAGGGGGCTGTTGTACACGCAATTTGTCGCTCCTCAAGACCA

CGCAACCCAAAGCATTCTTCTGGAATAATGTACCAGGTCTCTTGGAATGGGAGAAGCCCTGGAAC  
TATAGTGACGGCACTCCAAGGAGCAGGATACACCGTGACCATAGAAGTTGTACAGCAGGTGTCTC  
ACGGCACAAGCCCGCAAACGACTCTTTTGTGGGCTTGCGCAATAACAACAACAACAACGACA  
ATTCCGATACAGCACCGGTAGACTTTTCGTTTCCGTTTATGCCGATTTGGGGCTACGTGCGGGAGATA  
TCCTTGACTATAGCGTGGGTGATTTGGACGAAAAATGGCAACCTTCCCGACAAGTACGAATTCTATCGT  
ATTACCCATTCGCAAATGGACCAACTCTTGAATCGATCCAAGAGGTGGAAACCAGCAAGGCTTGCGT  
GGCAAGACAAAGTCTGCGATACGATCGATGGACACTACGGTGTACGATTGGCAAGGGAAATTCGCA  
GCTTGTGCTTCTCCGGCGCCGCTTTGTCCCGCAGTTTACACCTCGTGAGTGTGCGCGACTCATGGG  
ATTTCCAGCTTCGTTTCGGATACCATCCGAACCAAAAGAAAGGGCAGGGGAAGAGAGCCCATCTAAAG  
AAACAGTACCTCATGTTTGGGAATGCCGTTTGTCTCCGTTAATTGCGGTGTTGGCGGTGCCGTGCTA  
GCGGAGGTTTTGGGAATACGGGACTTTGCTAATCCCAACTATTGGAGAGCGAGGGGTTTGGAAAGTTGG  
TATTCGTATGGCATTGGATTCTTTGCTTCCCGAGCGTCAAGATGCTGTCTGCCAACGTTTGCAAAAAAT  
GGGAATCATAGAATAGTGTGACAAGCACTTAGTGTGGGTTTTGCCACAATGCTTGCTTATTGGTGTGT  
CTCGGTGTCGTGCATGCTGCGTCCGGCAGGCAAGACACATCAAGAACTGGACGTCAAGTCTGTTGATA  
ATCCTATACATTCTTGGATGATGGGATAAAGCAAATATCGATTTTACGAGCGAATACAAACACAAAAAT  
CCAGAACTGAAAAAATAAAAAAGGAAACGGAAAGCCTTCTCATATTAATTTAGTATCTTCATTTTGT  
AACA  
>TRINITY\_GG\_2454\_c3\_g1\_i1 len=8885 path=[0:0-3319 1:3320-3389 2:3390-8884] Gene\_family="Bacterial-like  
DNMT"  
GACATATCAGAGCAGTTGAGGCTCAACATTGCAATCGACCTAGAAAAATCCCACTTTATTTTGGATTCC  
AACTTGATGCTGTTGCGACAAGTGTGGAGAATCAATTGGTTGGCGCTAGTGACCATGAAGTACGATTT  
TGTCAGGTTCAATGGGGCAGCCCATCGGAAGAAGCCTCACCAACCACTCCAAATTTGAAGCCTCA  
AGTCAAGCATCCAGTTCGCTCCTAGGAAAACGGGCATCTGAGGAGAATACACGCGATGATGAAGGCG  
AAGTTGAAAGTGCAGATGGTTCTAGAGAATCAACCTATAATGCTTCAAGCAACTCGTACAGTGACAC  
AAATATAGCTTCACTCCTATCTTTCTCGCAGTCTGGTTCGACTCCATCGAATGAGCGGACCGAGAGTAG  
ACTCCGTGATGACTCAGTCTCACCAAGGGATGATGTTTATGATGCAATTGAGACTTTCTCTGACGAA  
ATCTGAAAATTTCTTTAGGGAACATCGCACCATCCGGGAAAAACAGAAACTCTCTCGAGTCCGTTTTGC  
CTGATAAGGAAGCAGGCCATCCAGAAGGGGAGGGTGACCCACTACGGAAGGATGGAAAACGCAG  
ACTTGAAAGTTGAGTTTGGATATCCTTCTTTGATAAAGAAGCAGACCAGCCTACAACGGAGAAGGC  
AACACAAGAAAGAGCGGAAGACGTTATCGAAGTCGAGGAAACGGTGAAAGATGAAGAAAGCATGA  
AGAGTCTTCCAAACGAAGGTCCTAGAGCGGGATCTTCCAATCTCGAAGCTGACAAGCACGTCGAAGA  
GAAAGCAGAAGTCACGGTAGAATCAAGTGTTCGCACTGATAATGTATCGACTGTGCAAGAAAAGAAC  
TTTAACGACAACGGAGGCATCGTTACAGATTTCTCTTGTGTGCTGTTGAGTCACAAACGCAGAGACT  
CTCGAATTCAATACCATCGGGTCGTTCTTGTTCAGTTATCTTTCCCTAGCAAGCAAGAACTGAAGAA  
GATGCCAAATCAGAAGGGAAAAGTTTCAACGAAGCACATTCCGCCGAAGGTGAACAAAGAACTAAT  
TCGAATATAGAGGATGAAGGCCGTGAATCCCCTGAAGAAGGCCGTGAATCTCTGATGAGGTAACGA  
ACGAATTCGACAGTGGCCCTTTGCTTTCGCAAGAAGGTAGCCAACAGGCTGAAGAAAAGCTAGACGA  
ATCTGCGTCGAAGCTTGACTCTGATACTATTGATTCTGATTCCACCCTGGCAATAAAGAATTCGAAGG  
CATCTTACGTGACCTTGAATCAGTTTGTGGGAAACAGCAACATAGAATGCAATGTCTAACCTTGAT  
CTGATCACATTAATAAGCATCCTCCAAGCCAGGGACATGAGGTTCTAATGTGACTCAGGTTTCTGAA  
GAACTGAAGACCAAAGAAGACCAGATGCTAGTGGAGCAATCTGTGGTTCGTACAGAGACCGTGACTC  
CCGCGCAGTCAACAAGTCAGAAGAAAAGGGAGGACGCAGAAAAATTCAGGATAAAGCGGCTCTTTT  
GTGCACTAGGTCCTTGTTCACAAAACCTGTTCTAAAGGCCGTAGAAGAAGAAAAGGATAATGAGAA  
AGTTGAAAGTACCGTGAATGTTGTGATAGCCCTGGGAAAGCTGAATGCTGTTGAAAGATGAGTCCC  
TCAAGAAAAGTTCTATGGAAGAGAGCGTGCATCAAAACAAATTCGGAATCGCAAGGTGGGGTTCTATT  
TAGCCCTTCAAATCAAGTCGAGCCAGTTTTAATTTGTCACTCTCTTGATCTGCATCAAGTGCACCTCG  
TCAGGCGGTTGAGCCCGCCCTACGGAAGAACCCTCCACAGTGTCAATTGCAAGTGAAGTGGGAGCA  
GAAAAGGTACTGGAAGTTGACAGTAAGTATGAATCGACGAGCATTAAACAATCCTCCCAGGACGACA  
TCGCCACAAGGAATGATGTCGGAGATCTTCCAGTTGCTGGGCTTCAGAGGGGGGTTCAACAATTTCA  
ACCCAACTGAAAGTGTCCAAAGCTTCGAACCAATGAGAATCTCCGTGGTAAGTCACTCTGTTGGGG  
CTTTCAAATGGCAAATGCTCAAGATCATATGGCTGCGTTTTCCAGCAAAGTTATACGGAGAGTAACG  
GGGGGAAGTATGGATCGTGGTTGTCTCTCAAGTGTGCATCGGAGGGACAGCCTCTACACCCAA  
GAAGGGACAGCTTCTACACCAAGAAGGGACAGCTTCTATACCCAAGGGTCAGCTTCTACACTC  
AAGAAGGCACAGCTTCTACACCAAGACGGCACAGCTACTTACACCCAAGGAAGCACAATCGCATC  
GGAATCGGAGGTGAGTACGAGTACACGTTTGATAGTACAGGACTGACAACGGAGAAAAATCCAAGTGT  
GACCAATGCAATTCTTACATGAGTGTAAGGAAGCAGTCAAGTACAACTTGATGATGATGCAAGGTT  
ATTTGTAAAGAGTCTAGGCTTCTCTCAAGAGGCGATTGAACAAAAAGAAAGGAAACGAGCGAAAAAGC  
TGGAATGCAGAATCTGCTCTGGTCAACCCTGTTCTCTATGTTTGGTGAGCTGGCAGACATCCTTGAG  
TTTAAATTTCTTCTACCCAGGCAGAACATAATGGACTTTGCGATGCCTCTCGGGACATCTGGCACCA  
GAAGGAAGTCATCAAGTCGCGGAGGAAACATAAGGTATCGTTAGATCTAATGACAAAGTTATTTGTA  
CGTAAAGGGGTAACAGTAGGAAGTGTCTATTCAAGTGCGCCAATACGTAATAATCCACAAGAGACTCA  
ATTTCTGTCTATAGCATGCCACTTTGCCGATAGAGGCTATGTTGAGGACCTTACTCAAAAGCTCATT  
GTGTGTGCCCATTTCCACGATTATACCATCTCTTAAGACGGCCACGCGATCAGCTAGACGACCTATTGC  
CCATTTGTTGATGTTAGGAGGCTTGCTGCTCTGTTGAACGTAATTGTTGCAATAGCTTTGATTCTTCT  
ACCTCCGAAAATGAACTCGTTGCGTCTGTCGCAAAAGCAATAGAGAACCAGCAACAAAGAAATGCTCCACCC  
GATCGCTCGATCCAGCTGAACTATCATTATCGTACACGGCTTGAGCTATGATTTTTGATAGCAAGAGTT  
TTGACCATTCGGTTGGGGACAACACCGTTGATCTTGGCTGTAGCAGAGAAGGTGCGAGTTCACTTCA  
CTGGAAGCCACGATGTAACCTAGCTTCAAGTGGCAGCTAGGCAAGCTACGATGTAACCGGTCA  
TCTGCGAGTGTAACAAGTTCAAGGTTAACTTTAAAAAATTCGCCATTATTTCTACCGACAAACTTGCTT

ACCTGCAACCGCGAGCATGATACACGACTTCTCATATAAGTACCAGATGAGCTGCCACTCTTAGAGGGGT  
GATGGGCTCAAGAATTTCTCAATTGTGGACCCAGACCACACTTTCGCAAAATCAGCAACAATTGAGA  
CGTCATTTAGAAGCAAACCAAGTCTCTTCTTGAGGTGACTCCGATCCCACCTGGTGGTATCAATTCCAC  
CAAGCGATATGTTTTCCACGAACGAGAGTCGAGGTCAATCCTTGACTTGGTGGAAGCAGCATGGATTCC  
GCTAATGCTGTCAAGAATCGTGTCTTACCAGCCCCATCATCGCCCAACACCACCAAAATCTCCCCGT  
CCGGCAGACAAGAGTTAGCGCTTTGACCGCCCATGCACGTTTGGCAGTGAAGCTGTCCATAGATCTC  
TTACGCCAAACCTGATGTTGGATTAGCGGAAGATGGCAGGTTAGCGGTATTATTCTGTGTTCTTGACA  
TTTCTTTCAATGCTAGTCGGAGTGAATGCAGAAACGCGAAAAGGCCATTTTCATTTGGCGTTGATTGAA  
CCACGAAACCAAAGGTATTCCAAACCCTCGATTGGTGAAAAGCAAAGTAACACAAAGTTCCAGAA  
AATACGTTTGTGCGAATCCATTCCAACCTAACCGGTATTTTCAACAACAAGCCAAATGCTATAATTGGT  
GCGGCAAGCATCGAAAAATGACAATCCAAAATACGCCAAACGTCGTAGAAAAGTGAGCCTTGGCCAA  
TTTTTCTCAAGAGGTTAAGTAGCTTCTGGCTAAGTCGCCATCGCTATTGTGCTCTCGACCGCGCGG  
TTGTAGCAAGCAGAAACAGCGCACTTGCACCTTGATGACCCAAGATCAGCTACTGCTCTCGCTTAGCC  
GGTGATTCTGGATACAACTTTCTTCATCGTTACTACTCTGTTTGGACCAAAACATTCTCCTTATTTCAA  
TCATAGGAAGCACTCGAATAATGAGCAAGGCCAGCAGAATCGACAGCTGCACTCCAATCTGCAGTGG  
ATGATGCCCCACCTTCCACAACCTGCACCTTCACTGACGCCAAAAGATTCTTCATCGAAGAAACCAATA  
TCTCCGAAATATCATTTGCAGACCTTCCGAAAGTGAATTGGCCAAAGAGGTGAGTGCCACCAGCGTATA  
ATATCGACAGCAGATTCGTATACAGACATCAACGCCAGCGCACTTCGGTACACTTGTGAAGCAA  
GAGCTCCCACCACGAAGGTAAACAAAAGTTTGTAGACGCGCAACATTTCGATCAGCAAGCAATAGCTTGTA  
ATGCGCAGTGTGTCCAAGAAGGGTTGGCAAGTCCGGCTCAATTTCGATTGATGATACAAAGTCGCAAGT  
ACAGCATACCATATTCTGCTTCGTCCTTAACAGTTGATCCAACCGAAGAAACCAGATTCCGGATTTTA  
GTGCCAAATAGCAACGAGTTGGACCATGCACTAAGGAAGGCTGCCACGAAAGCAAAAGGAGCCCAA  
GTGTCAAAAAAAGCAAGAAGACCTTCACGTAATGCCGTGGCATGTTTCGTCCGCCCCCATTTGTCGCATA  
CCCTCCTAGGAGGACGCTCTCAAACCGGAGGAGTAATGAATGATAAAACAAACGTCGAAGAAGTGTCT  
CGCGAATTTCTATTCTCTGCACTGCTCGCTGACTTCCCCGTGGTTCAGCAGCAATCCATGGCCATCTTCTC  
CACATCGATCGAAAAAGCTTCTTCAATATATCGGGGGAACCTCCTTCTGCGATTTCACAGAATTTCCCT  
TGTATGGTGGTGGAGCAATGTACTCAGTAGGTTTGTCTGCTCGAAACAGCCTCCAAAACACCCCTGAG  
CGATCTGGCTTGTCTGCTGCTCCGCTTCCCAAGCATCGAGCCTTGGATAGTTCTCATACGAGTAGCTTCGA  
CCAATTCTCAAAACTCGCTTCAATGACGAGAAACAGGCGCATACAGGTAACAGGTAACAGCTTCGCAATT  
AGTCCAAAGAAGTCTCTCGTAGCTTCGACTATTCGGCAATCTACTCCTTTTCTCGTGCAATAGCTTCT  
AAGGAGCTCTGTATACCAAGTTTGGCGGTTTCGGCAATTTATTTGGGGTCTGCGTCCGCCAAAGGAGG  
TCCCCTCTGCTGGTGCTAGCTTGATTGTCTCTGCTTGGATAATGGTTGGAAGACGAGGTCTAGATCC  
TTCAGTTTTTGATGAGTCTGCTTGAGGAGTGAAGCTCATTTCGGCACTTTGCTGGCGTTGTAAGTACAC  
ACTTTCTGAAGTTTACGCACTTCCAGTCCCGTAACCAATTCTTAGGCTGTTTCTTTGCTGATTACGACTG  
CTGAAGCTTCCGCTAAGGCTTGGATCATGAGGCGATGAAGCACCCCGCTTGGCAGGCATTCTACTTGA  
TTCCTTGAAGGCTCTGCGTAGGAATCACTTTTCCAAAGTTTAAAGACAGTCCACGACTAGACGTAATC  
GTGTCAGTGATCATCTTCTATGAATTTGTGACAGTCAAGTGAATCAGAAGCAGCGATTCTTTCAT  
GCCTGCGATTTTCTGCGGGTGCAGTCTCTTTGCGATCGTTGAAACTCATGGGAGTCTTCAAGGAAT  
ATTCTTGCTTTGAAAAGAGGAATCTTATGGAATGCCCTTGTGAGAATTCGTAAGTCTGCTGACCTTCAACA  
GACTGATTTTCTGATTTTCTGCTTTGGACATTGCGACTGCTGTCAAGAACTTTGGTTTCTATTGGA  
AACAATCGGACCTCCTTCTCAATACCATACTTGTCCAAGATTGTGGATCTCTATCCTTTGGAGTTTCG  
TTCAGCTGTTTGGCTGCTTCGCAACGATGCCTGGTTATGAGTTTGTCTTCGCCAATCGCTCGACATG  
CTGGGGCTTTTGAGCTATTACCTGGTTCACCTCGTTCACCACTAATGTACCCCATAGAAAATGGTTTTT  
TCTTTCTGTCGGCAGATCGTCCCCGTGTTTCCAGCCGCAAAATCATGCACTTTTCCACTCGAGGTGGG  
GCGACTTGGATGCGCTCGCCGCTAGTTTGTCTTGAATCCCTCATATCAAGAGCATTAAAGGTTGTGGAC  
GTGGCCACTTTCACGTCGCTCGGGTTCTTTGTATATTGCTGATCCATCAGAAGTACCGGCAGAAAGTT  
CGATCATCGTGGTACTGCTAGACGATGGTAGCTTCTGAAGTGAATTCACAAAAGATATCCAGTATTG  
CTCTTAATCAACACTTCCATATGCTTTGATAAGCTATCACTCGTATGTTTCACTCTCCGACGGCAGGTTCTG  
ATTTCTCTGTTGAATGACATGGGCTTTGAAATGTACCGCCGTCGCAAGGTGGCGGTGGGTTT  
GCGGGTTTGTGCTGCTGCTGAGCAACGCTGGCTTTCTCTGCTGACCGTGAATTGCTCACTGGCAATTTAT  
CCATCTCCTTGAGGGAAATAGTCGAATGAGTCGGACCCGATTGGAAGAAGAAACAGATTGAGATCG  
CTTGCTGTTTCAACCTCATTACCAGATCCTCATTATAGCCATAAAGCTATTCTGTCAGTTTCTTCTCG  
CCGATTTTGGCCGGAACAATGCCCTTTCGACTGGAGGAGGTGCAAGGGAATTTCTTGGTACTTGTGC  
AGTAACACCGCTGTTTGTGATGTCATGGAGGCCAAAAGTAACATCTTTCTGATTGTAGGCGGCGCAA  
TAGAGTTCTCGAGTAGCTGTCAGTACGAGTCTGTTTGTCAATTTCTCTCGTTGATTGAGCTGAAG  
CAACATCTTGAGCAGGTGCAAGTCAACATGCTGTTTACCAATTTCTTCTGTTGATTGAGGCTGAAGTCA  
CAGGCTTTTGAATGGAGGAGGTGCAACAGGATTTCTGTTGACCAACGGTGTGTTGTAATTTCTGCT  
CGCTGATTGAGCCGGAAGTAGCATCCTTTCGGTTGGAGGGGTGCTGCAGAATTTGGAGGTGCTTCT  
GCAGTCATTAAGCGTTGGGCAGTGTCCGATGATTGCGTGAGTCCGAAGTCACATCCTTTCGATGGG  
TGGAGGTGAAACAGAAATTTGGCGGTGGCTCTTACGCCACAATACGGTTGGTCAGTTTCTTCTGCTCGAT  
TGAGCCCGCAACTGACTCCTTTCTCTCGAGAGGAGGTGGAACAAAAGTACGTTGCTCTTCTGACGTG  
CATCGTCTGCTGATTGTTCTGCTGATTAGCCCTTTCCGACTGAAGGAGGTGGAACAAAATCAGCTG  
GTACTCTTGCAAGTACACCGCTTCTGTGCAACTTCTTGTGCTGATTGACCTCGAACTCTGATCCTTAC  
GACAGGAGGTGGTGAACAGAAAGTCGTGGTACTTGTGACGCCACTACGCTGTTTTCAATTTCTTGTG  
GCTGATTGAGCTTGAAGTGCATCCTTACGACAGGAGGTGGTGAACAGAAATATCTTTTCTTCTGT  
GGTCAAAACGCGGTTGGTCACTTCTCTGCTTGAAGCCGAACGCACATCTTTCCCATTTGAAGGAAC  
TGCAAGAGATTTTCTCGGCACTCATCTTGCCTTTGATAGGACTGGTCTTCCATCTTTGAACGCCATCG  
GGAGTCTTCCCGCAGAAAGAAGCTCCTTTGAGTTTCAATTTTGGCAGATGGTGGCATAGGACG  
TATGAGTGTGGCGTTTGCATTGTCTCAGCAAGAAGTTTGGCGCTATGGTGTGAGGTGACCGTCTAC

AGGAGATTCATGTTTCCACCTTTTATTTTCCTCTCATCAGCTTTGAGGTCGTTGTTTGGTAACTCTTTGG  
GAGGAGGGGGAGGCACATGAGAAGACTCCTGCCTTGTGCTACCTGAGCACTGGTCGTTGTAGA  
ATTCTTTCTCTGACGGCATTGATTGTGCCTCCATCGCATCGTGAGACAACCTGCGCAGTCTTCTGCTTT  
CGAGCAGGTGGTGGAGGGACCTTGAAATTAGAGGGCAAATCTGGCATTGCAGGCCGTTTCTGACTACAG  
AATCGGAGCTCTTTCGAGCTCCAGTCTTTTCGACGAGTCCACCACGGGCATCTTTTGGAGAAAAGGCC  
GATTGCATGCCATCGCGGTAATCTACTGCAACATGATCCGAGCTAGCTGCAGTCACGTGCAGGGAAG  
AGGACAAGAATCCTAGTGCAATCAAAACACCCAGTTGTGCGGCTCATGTTAGGAAGGTGGCAGCACTA  
TAGTACTCTGAAGGCGAATGTTATATAGATTGTTGTACCGACGCACTGAAGAAACAATTTTATTATCA  
CAATGCCATGTTTGGGAGTCGCAGCAAGAACGTTGTGTGATCAAAACAATCAACGACTGCAAAAAACGA  
GATGTTTTTCGGAATCAACAACAAGACATCTCTTACATCTCTCGATCAATCAAAACCAATTTCTACGGGC  
ACAACCATCCCATGAGTACACTACCTGGGTAAGCGAAAAACTGACTACAAATGGCAATCCGATCAAC  
ATTAGATCGTTCGTCTTACG

>TRINITY\_GG\_3217\_c7\_g1\_i2 len=1132 path=[0:0-915 1:916-916 2:917-1131] Gene\_family="Demethylase"  
ACAACAACAACAACAACAACAACCTGTACCTCATCCTTCCAAAGAGCAGCCTTTCCATGAAGACTCGG  
AAACGTTCCCTATCAAAGTCAGGATCAGGAGCACCAGGTCCCTTCGGCAGATGATGTGAAATCAAATA  
CAATTGTCGACAAGCTACATGTCAACCAACCCTCCTTCTAGCGATCTCAACCCCATTTCAATCCCTA  
GCGATCATCAAAGTAATAGCACCACCAAAATCGACCAGTCGTTTCGTAGACGACTTGCTACAGGACCAT  
GGGATTGCAGTCGAGACCATCATGACGACCAAGGGAGGTTGGTGTCTTCGAAAGGGTCTGCAGCATG  
TCGTATCGGTAGAGAATGGAATCTTACGATCCTTGGTAAAAACAACATGGTCCACCTCCCTTTTATCATA  
CTCAACACAATGTGCTCATGAAGCGCAGCAATCTCAAGGCACCCCAAACTGTTTCGAGTCACTC  
TGTCGGACCATAGCTGGTCAGCAATTGGCTGGCAAGGCAGCACAATCGATATGGAAAAAACTCTTGA  
CAACCACAACAACCTCCTTGACTCCCAGCGTTATCATGCAATTGGCGGCTACTACGGAAAAATGGCGTG  
GAAATCAATTTACAAAAGCCGGCAGGATTATCAGCTGCCAAGGCTCATTCGATACTCGATTTAGCCCA  
ACACTTTGAACGAGGGGACTTGTCCGAAGACTTTCTCAAAACGTCATCGCAAGACAAGGTTTCGAGAG  
GCGCTCCTGAAAGTCAAAGGAATTGGACCATGGTGTGATGATGTTTGTCTATGTTTATTTGGAAGAT  
CAAAATGTCTTTCCAGTGGGAGACTTGGGAGTACGAAAGGGTGTGGCTAGATTCTTTCGACTCCGAGG  
GACTGGCAAAAATGCTTCTCTTTGTCCCAAAAAAAGATCTTGCCAAAAATCCAGCAACTCGTCACTCCC  
TTTCAGCCATATCAATCCCTCCTTACCTACTATATGTGGAGAGCCGCGGATGTCAAAGACCTGTATGTG  
GATGATACTGACCCGCCACGATGTGACCCCATCATCAAAAAGTCCACTTCTCCGAAGAAACAAC  
GAATTGTACCCCATAGCTAATGTAGACACATTTCTATATGGTTGAG

>TRINITY\_GG\_1139\_c1\_g1\_i2 len=1546 path=[0:0-1454 1:1455-1545] Gene\_family="Demethylase"  
TCTCCTTGGGTTAGTGCTATCTACATTTTGTCTTGTGTTTGTACTGTGCAGAAAGATTTTTCGTTTGC  
GTCTTTTGGGCTGAAAGAAGGAACCTGTTTTCGACTTGCTTTTCACGGTCTGCCTGACAGCTTTCAAAA  
CTTCTTGTACTCCTGATGTAACCCCATCTCTTTCATTTGTCTCTGTCTATCCATCGAACGTGTTTGCCA  
TTGCTAGTTGTCCACGATCGTATGCTAGTAGGTTGCAAATCAATATCATGACTCGCATACTCTACCCAC  
ATTGTGTGGCCGACATGACTAAAGACGTGTTCAAGGGGGGTGACCCCTTGTAAAGACGTGTCCAAGC  
AGCCTCGAAAGTGTGCTTTCGCTGGTGCATTCTGCCAGCACATCTCCACGAATGAGGTGAGAAGCT  
TTCGACGTTTGGGGCTGGGATTATGGTACTTCTTGTGACATTCCTAGTTGTTGTTGTTTGTGTTG  
GACGATGCAGGTTGTCGATCCTCGCTATTTCCAAACACAAACAGACCGGAAATTTCCATTGCCCTGC  
CAATAAGCCTTTTTCAGGACGCTTCACTAAGAGCCATGAAGTAGTTTCTTTTACGATTTGCTCTCCGA  
AGGATTTACCCCGGACAGGACAGCAATTGCATGTACTTCTCTCGTTTAGCAAGCTTGGGTGGAGGGA  
TTGGAAAAACACTATGGCTTGCTATTTTGGCAGCCGTCTCAGGATCCATTGGAAACCGCAGTATTTTCTT  
TTCCGCGTTTTCCTTTGGTAGTACCTCCAATTTTGTCTTCTCGTTCAAAAATGCATTTGGAGATATCTCC  
AAGCTATGGATATCCATTGTCTGCACAAAGTTTGAAGCAGTACTACTATTAGTTGTCTGCCATCC  
TGTAAGACTCATCCAACAACCGGGTGTGTGAGAAAAAGAACGCTCCAATTTTGGTTCGACAAGTAAT  
AGTCTCTCAATGGATCTTGATCATCCACTCCCCTCCCGAGGGGGAGCAATAGGTGCTCCGAGTTCC  
ATGATGGCCTGATGACTTCTCCAGCAGCAGGGTCAATTATTGTATGTTGTGTTGTAGCGTCCATGATT  
GTTGTGCCAAATCCCAGGCTTTTCCATCTTTGACAGAGGGTGCCTTGATATGATTTGCAATCCCTCGTA  
GACGACACAAGACACGACAGACATTGCCATCAACGACTGCTACTGGGACATGTATGCAATCGAAGC  
AATGGCAGCTGCTGTATAAGGACCAATTCCAGGATGGCAGGAGTTGATCCACCGTCTGTGGCAATT  
CTCCATGATGGTGGGTGACGACATACTTTGCTCCTTGATGCAACAGGCGAGCTCTCCTGTAGAAACCC  
AAGCCTGCCAATGAGAATTTACTTGTCTTTCAGTGGCATTTCGCAAGATGGTGGACTGTAGGGAAGGA  
TTCCATCCCTGATGGACAAGTAGGAAAAACAGACAAAAAAATGAGCATGATTCTTTGGGTTCATGATG  
AGATTGAAAATAACTAGAAAGTACATTATCAC

>TRINITY\_GG\_1141\_c0\_g1\_i1 len=300 path=[0:0-299] Gene\_family="Demethylase"  
CAGATGTGGAAGTCTTATTGTCTTTTGTGTTGTGTCCTGTAAGCATCATAAGGAGGCGGGTACCTC  
TCCAGGGAAGTTTGGCTCGATTCTACGATACCAAGACAATAAGGCTTGGCGAATCTCGATGGCCTGC  
TGTGGAGAAAAGTCATGAAAGCTTGCATCATCATGTGTGACCCAATTTTGGACTTCATGATCGTTCTTT  
GACATAGTGGCAGTAATAATAGAGATTCTCTCTCTCTGAGTAAGGTTTTTCTAGTTGCTGCCGCC  
AAAAACACGTTCTGTCTACTGCTCC

>TRINITY\_GG\_4447\_c52\_g1\_i1 len=1559 path=[0:0-1558] Gene\_family="Demethylase"  
CGACAACAAGAGAATGAATGAAAAAATGCTGTGACGCGCGGTGGTGAATTTTTTGGCGAAAAGAA  
TGCAATATCCGAACGAACGTGGTGGAAACAAGTTTTTGGACCGGAGGGTGTGTCATATGAGAAAACAAG  
TTGACTTCACGGTCGTCTGGTGGTGTATAGGACAACAAGAGAAAACCTATTCGTACAACATAAC  
GACTAGTAGTAGTTGGTTTGTCTATTATTGTTGTTTGTGAGTTGAATTGTTACAATCTTCTCCGCGTT  
GTTTTTCGTCTGCTCTAGAATTATCTACTTGGGAATTGCAAAAGACCAAGTTTACCAGCAGCAGCAGCAA  
TGAGTAGCCGCTATCCTCTTCGAAACCGTCTGGACTCCAGACAACATTATCGCTACAACAACATGGT  
GACGAAGTTCTTTCAACAATCGGACAATGTTCAAAAAAGTCCATCAGGGATCAGAGGAGGTTATTCTTCC  
TCCGCTCCGAGCACTCCATCCTTGCTACCAACCGGAGAAATGCAGTGGGACCAAAACGAAAGTCA



CCACAACAGCCGGCAGTTATCACTCCCACCTCCTCCATTGCGCCATCGTCATCATCATCATTGTCATTG  
CAGAAGAACAACCTACGACGACAGGAAAAACCAAAGACGATGTTATTTCTCCAAAAAACGAAAAAAG  
ACAAAAGCAGTGCTACCTAATACGACTCCTCCCAAGGGATGGCAAGAAATTTATTCATCTCGTGGAAG  
AGCTACGGCAAGATAAGACTGCACCCGTAGATAGTGATGGAGCAGAAGCCTTACCAAACCTGCAAGG  
ATAATGATAGCAAAGAATATCGATTTCAGGTCTCATTGCACTCATGTTGAGCAGTCAAACCAAAGAT  
GCTGTAGTAGGTGAAGCTATGGCAAATCTACAAAACCTATGGATTGAATGTTTCATTCCATACAGCAAAT  
TTCATCGGAAAAACTCAATCAACTCATCCGCAAGGTTGGTTTTACACAACAATAAGACAAAATACATT  
AACAAACCGTTGAAATATTACTTTTCGGACCATGATGGGGATATTCCCAAGACGGCCAAGGAAATGAT  
GGAATTGCCAGGAATTGGTCCTAAAATGGCCTTTTTAATTGAGACCATTGCTTGGGGGACCACTTCTGG  
CATTGGAATTGATACTCATATGCATCGAATGTTTAATCAATTGAAATGGGTCCAAAGCAAATCACCCG  
AACAAACGCGACTTCAATTGCAAGCCTGGTTTCCAAGAGAACGTTGGTCGACTGTCAATTATTTATGG  
GTTGGTTTTGGACAAGAAGTCCAACAACAAAAACCGAAAATGCTGCAAAAAGGTTTTATCTTGTAGTCG  
ACCAAAAGAGGCCTTGAATCTAGTGAAACGCCTGGGATTAGATTACAAAAGGAAGGAGCCAAGCTT  
GGTCTTGAAGAAGCCATTGACAAGCCCTCTTGAAAGATACAAAGGATCGTCTCCACACGGATATAC  
AAATCAGCGACAGCCAAATGTAACTTTTCAGATATACCGTAGTCTGACGCACATACATTGTAACATCAT
